# Supplementary material for: Compliance with the smoke-free public places legislation in Nepal: A cross-sectional study from Biratnagar Metropolitan City
Source: PubMed Central journal article supplement (PMC8906589; doi:10.1371/journal.pone.0264895), 2022-03-09
Supplement: pone.0264895.s002.pdf [file pone.0264895.s002.pdf]

## OPTION 1: JURISDICTION WHERE SMOKING IS PROHIBITED INDOORS IN ALL LOCATIONS

### PART I. LOCATION INFORMATION

1. Name of location / facility
2. Address
3. Total number of buildings at location (only if you will be observing multiple buildings within one location) (E.g. a university).
4. Type of location (choose only one)
  - Hospitals
  - Schools
  - Bars/ Restaurants
  - Industry/ Factory
  - Public conveyance
  - Government office/ Building
  - Bus stands/ Airports
  - Hotels etc.
5. Date of visit \_\_\_\_\_ / \_\_\_\_\_ / \_\_\_\_\_
6. Data collector name / code
7. Time of entry to location \_\_\_\_\_ am / pm
8. Time of departure \_\_\_\_\_ am / pm
9. Photo taken?  YES  NO
10. Result of observation  Finished  Not Finished
11. If observation not finished, reason why:
  - Data collector not allowed to enter building/location
  - Building/location out of business
  - Other

### PART II. OBSERVATION INFORMATION

#### Observation Indoors

**100.** Name or number of building (if you will be observing multiple buildings within one location)

Yes  No

**101.** Is anyone smoking tobacco products indoors?

Yes  No



## OPTION 2: JURISDICTION WHERE INDOOR DESIGNATED SMOKING AREAS ARE PERMITTED IN SOME TYPES OF LOCATIONS

### PART I. LOCATION INFORMATION

1. Name of location / facility
2. Address
3. Total number of buildings at location
  - Hospitals
  - Schools
  - Bars/ Restaurants
  - Industry/ Factory
  - Public conveyance
  - Government office/ Building
  - Hotels etc.
5. Date of visit \_\_\_\_\_ / \_\_\_\_\_ / \_\_\_\_\_
6. Data collector name / code
7. Time of entry to location \_\_\_\_\_ am / pm
8. Time of departure \_\_\_\_\_ am / pm
9. Photo taken?  YES  NO
10. Result of observation  Finished  Not Finished (Go to Q11)
11. If observation not finished, reason why:
  - Data collector not allowed to enter building/location
  - Building/location out of business
  - Other

### PART II. OBSERVATION INFORMATION

#### Observation Indoors

**100.** Name or number of building (if you will be observing multiple buildings within one location)

**101.** Is *this venue type permitted to have a designated smoking area or room indoors?* (If yes, skip to Q106. If no, continue with Q102 through Q105.)

YES NO

**102.** Is anyone smoking tobacco products *indoors*?

YES NO

**103.** Do you see a designated smoking area **indoors**? (Choose "YES" if you see a designated area, even if no one is smoking in it.)

YES NO

**104.** Are there any ashtrays or ashbins visible **indoors**?

YES NO

**105.** Are there one or more no-smoking signs **in the venue/ location**?

YES NO

*Ask, only if the venue type is permitted to have a designated smoking room or area. Otherwise, proceed to 110.*

**106.** Do you see a designated smoking area **indoors**? (Choose "YES" if you see a designated area, even if no one is smoking in it.)

YES NO

**107.** Is anyone smoking tobacco products **indoors, other than in a designated smoking area**?

YES NO

**108.** Are there any ashtrays or ashbins visible **indoors, other than in a designated smoking area**?

YES NO

**109.** Are there one or more no-smoking signs **in the venue/ location**?

YES NO

### **Observation Outdoors (inside location boundary):**

**This part of the form can be used if the law requires outdoor areas to be smoke-free.**

**110.** Is anyone smoking within **X meters from building entrances and windows**?

YES  NO

**111.** Is the location required to be smoke-free outdoors? (If yes, continue to Q112. If no, finish observation.)

YES (Continue to Q112)  NO (Finish observation)

**112.** Is anyone smoking tobacco products anywhere outdoors at the location? (If there are no outdoor grounds at this location, choose "not applicable" and finish observation.)

YES  NO  Not Applicable (Finish observation)

**113.** Are there one or more no-smoking signs **on the grounds of the venue/ location**?

YES  NO

**114.** Are there any ashtrays/ashbin/ ashcans visible **outdoors** at the location?

YES  NO
